# Supplementary material for: Superhydrophobic stretchable sensors based on interfacially self-assembled carbon nanotube film for self-sensing drag-reduction shipping
Source: Royal Society of Chemistry journal article supplement (doi:10.1039/d4ra04793a), 2024-01-01
Supplement: d4ra04793a1.pdf [file d4ra04793a1.pdf]

*Supporting information for*

**Superhydrophobic stretchable sensor based on interfacially self-assembled carbon nanotube film for self-sensing drag-reduction shipping**

*Shuai Wang*<sup>a,c</sup>, *Weili Deng*<sup>b</sup>, *Weiying Yang*<sup>a,b,\*</sup>

*[a] Research Institute of Frontier Science, Southwest Jiaotong University, Chengdu, 610031, PR China*

*[b] School of Materials Science and Engineering, Southwest Jiaotong University, Chengdu, 610031, PR China*

*[c] Laboratory of Polymers and Composites, Ningbo Institute of Materials Technology and Engineering, Ningbo, 315201, PR China*

*\* Corresponding author.*

*E-mail addresses: [wqyang@swjtu.edu.cn](mailto:wqyang@swjtu.edu.cn)*

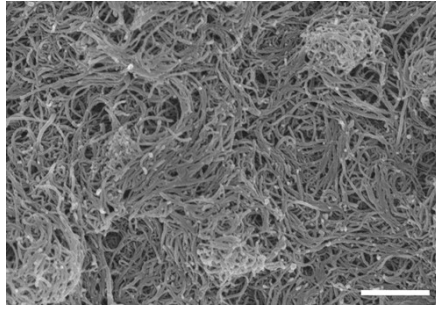

**Fig. S1** The SEM image of the interfacially self-assembled CNT film.

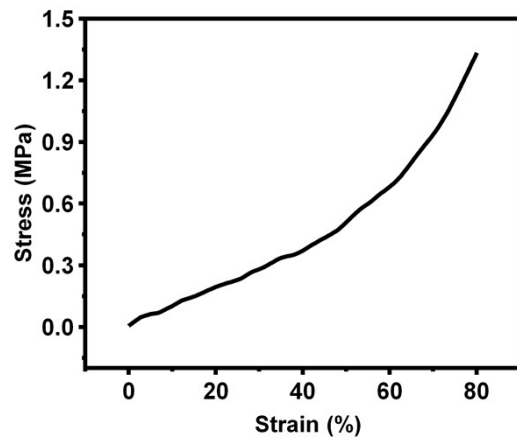

**Fig. S2** The mechanical characterization of the integrated composite film.

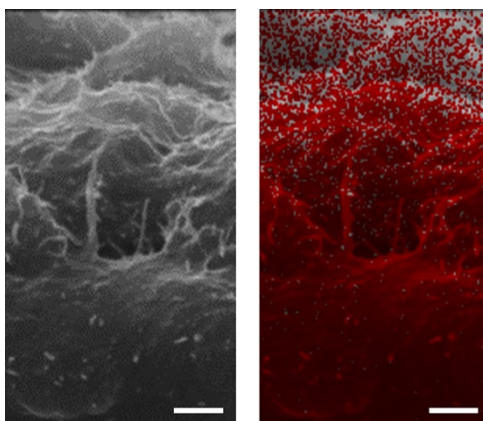

**Fig. S3** The cross-sectional SEM image and silicon elements analysis of the integrated composite film. Scale bar: 1  $\mu$  m.

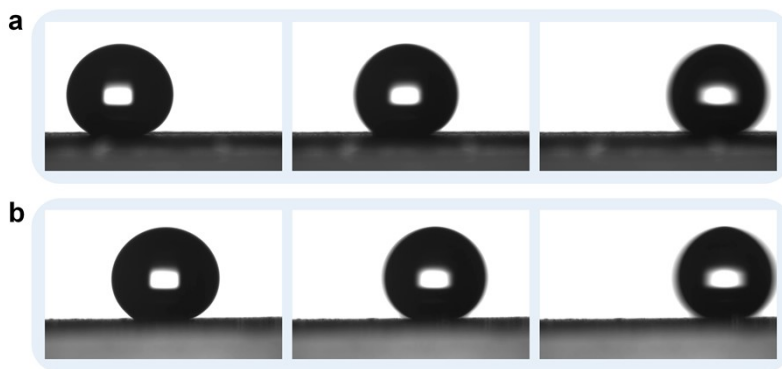

**Fig. S4** (a) The rolling processes of the water droplet on the superhydrophobic surface of the four-layer sample (sliding angle  $6.3^\circ$ ) were recorded. (b) The rolling processes of the water droplet on the superhydrophobic surface of the five-layer sample (sliding angle  $4.2^\circ$ ) were recorded.

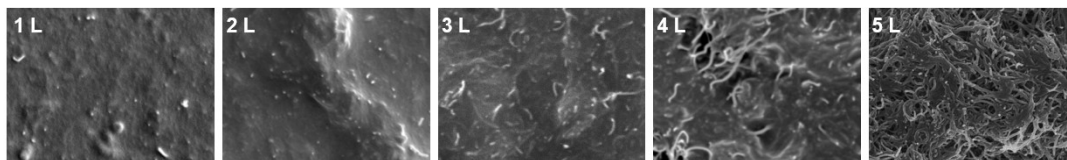

**Fig. S5** The morphological characterizations of the composite films with different layers observed by SEM.

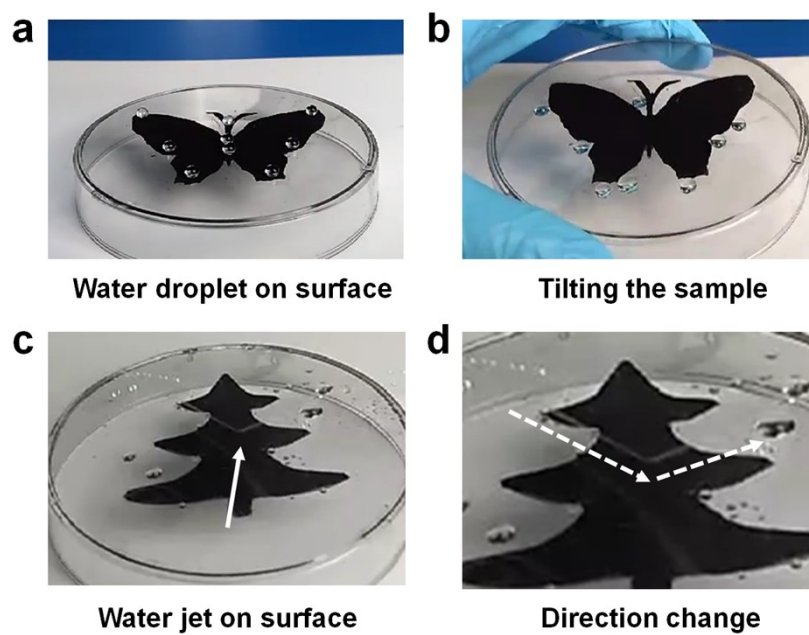

**Fig. S6** (a)-(b) The water droplets placed on the sample rolled off the patterned superhydrophobic surface by tilting the sample. (c)-(d) Direction change of the water jet on the patterned superhydrophobic surface.

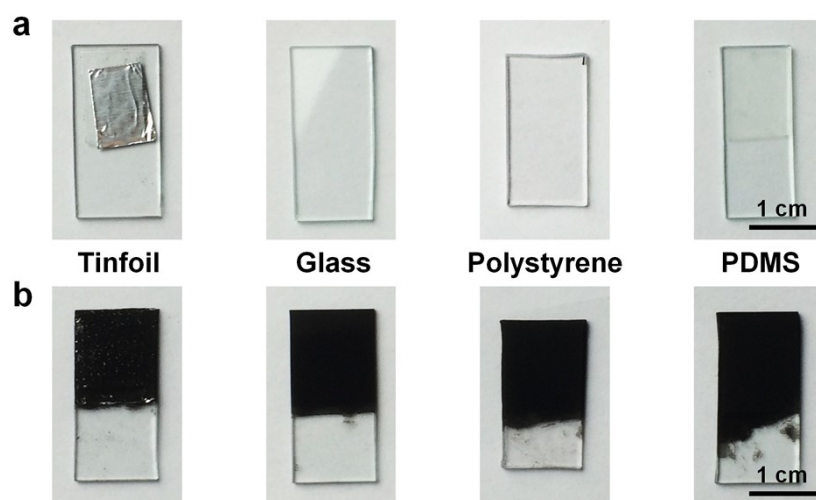

**Fig. S7** The optical photographs of the pristine (a) and treated solid substrates (b) of different types of material, including tinfoil, glass, polystyrene and PDMS.



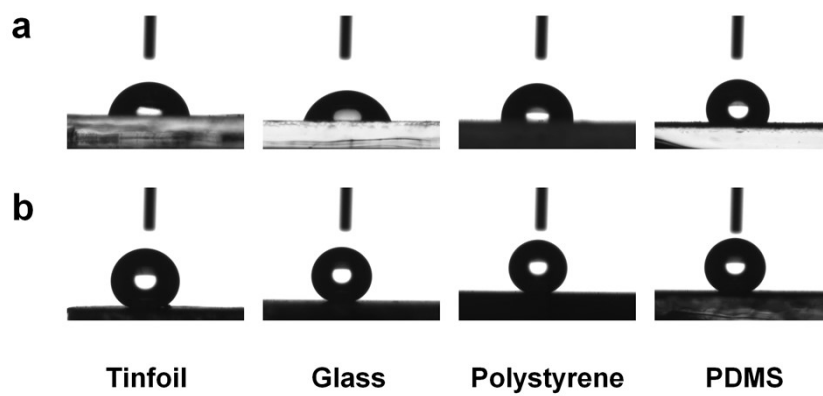

**Fig. S8** The typical images of water droplets on the different types of solid substrates before and after modified process.

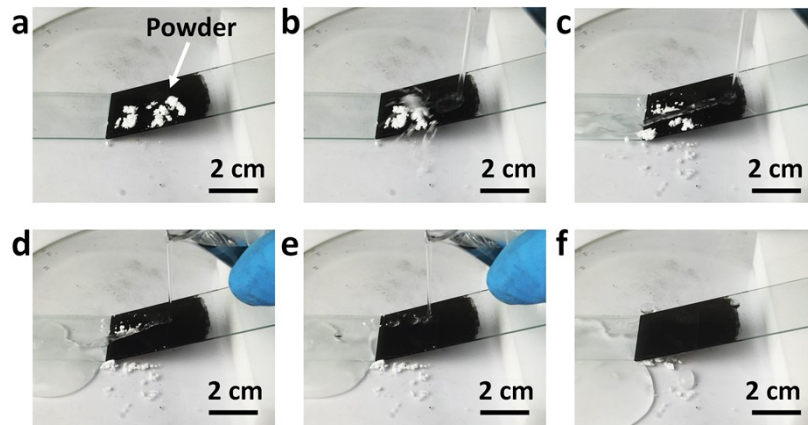

**Fig. S9** Self-cleaning performance of the superhydrophobic surface fabricated on the glass substrate. Powders were put on the superhydrophobic surface and then flushed with water.

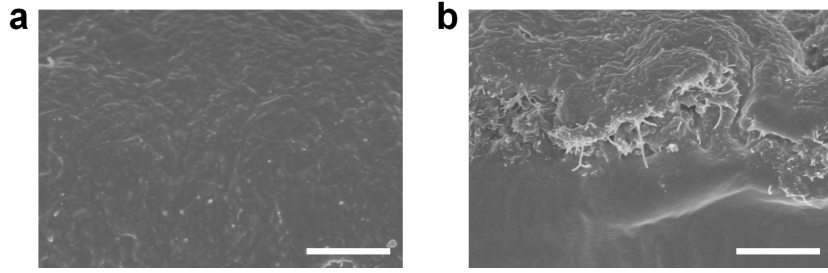

**Fig. S10** (a) The SEM image showing the surface morphology of the f-CNT/PDMS composite film. Scale bar: 2  $\mu\text{m}$ . (b) The SEM image showing the cross-sectional morphology of the f-CNT/PDMS composite film. Scale bar: 2  $\mu\text{m}$ .

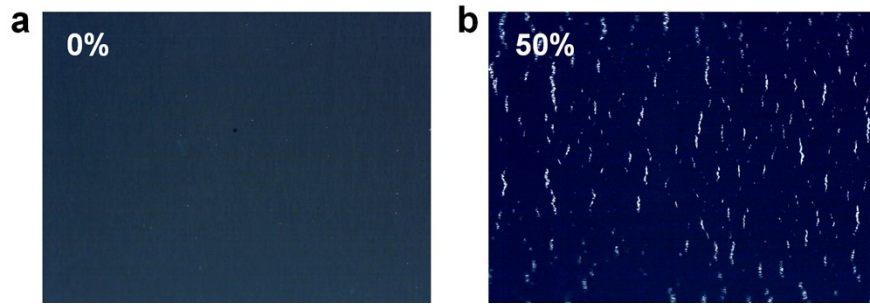

**Fig. S11** The opening (a) and closing (b) of microcracks in the f-CNT/PDMS composite film under external tensile strains.

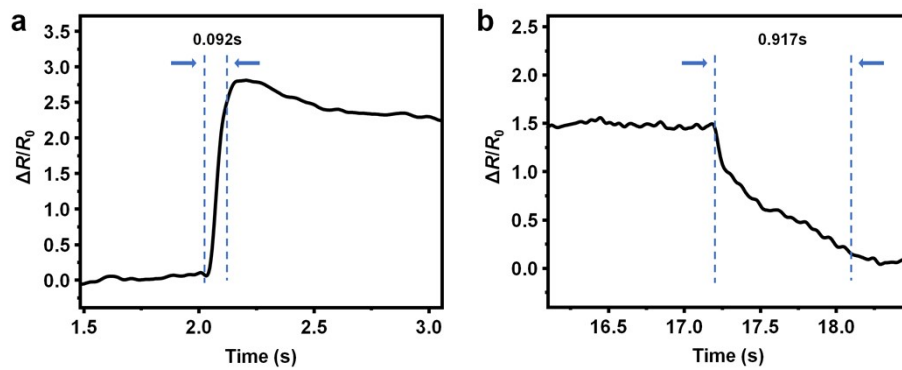

**Fig. S12** The response time (a) and the recovery time (b) of the stretchable sensors.

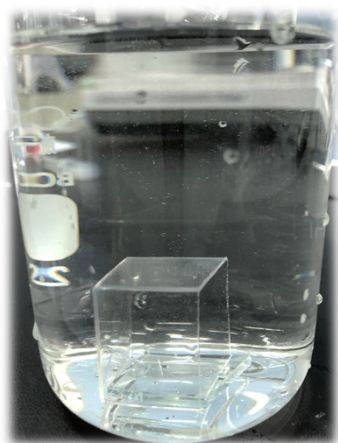

**Fig. S13** The artificial boat without superhydrophobic properties sank easily after loading cargo.

**Table S1** The WCAs of the solid substrates of different material types before and after being treated.

| <b>Types</b>    | <b>WCA (°)</b> |              |                    |             |
|-----------------|----------------|--------------|--------------------|-------------|
|                 | <b>Tinfoil</b> | <b>Glass</b> | <b>Polystyrene</b> | <b>PDMS</b> |
| Pristine sample | 83.6           | 72.4         | 98.4               | 114.0       |
| Treated sample  | 150.8          | 152.7        | 154.0              | 152.1       |
